# Supplementary material
Source: HighWire-hosted journal article supplement (https://bmjopen.bmj.com/content/11/5/e046393)
Supplement: inline-supplementary-material-2 [file inline-supplementary-material-2.pdf]

**Appendix B-** Search terms used within the literature search strategy.

Keywords for each subject heading of 'HIV' and 'patient-generated health data' respectively were combined using the search command 'OR'. Articles yielded within each of these searches were combined using the search command 'AND' to produce the final article results.

**Keywords used*****Subject heading: HIV***

HIV OR human immunodeficiency virus OR HIV/AIDS OR HIV-infected OR HIV-associated OR HIV-positive OR HIV positive OR HIV+ OR people living with HIV OR persons living with HIV OR HIV patient\* OR HIV infection

***Subject heading: Patient-generated health data***

Patient generated data OR patient-generated data OR patient generated health data OR patient-generated health data OR patient generated health information OR patient-generated health information OR personal health record\* OR patient portal\* OR personal data sharing OR patient collected data OR patient-collected data OR personal health informati\* OR personal health data OR electronic health record\* OR electronic personal health record\* OR electronic health data OR self-recorded health data OR self-recorded data OR self-generated data or self-reported data OR patient collated data OR patient-collected data OR patient-captured data OR patient-controlled data OR patient-reported data OR electronic record.

An example complete database search strategy, for Medline, is shown below:

| <input type="checkbox"/> | # ▲ | Searches                                                                                                                                                                                                                                                                                                                                                                                                                                                                                                                                                                                                                                                                                                                                                                                                                                                                                                                                                                                                                       | Results | Type     | Actions                                                | Annotations |
|--------------------------|-----|--------------------------------------------------------------------------------------------------------------------------------------------------------------------------------------------------------------------------------------------------------------------------------------------------------------------------------------------------------------------------------------------------------------------------------------------------------------------------------------------------------------------------------------------------------------------------------------------------------------------------------------------------------------------------------------------------------------------------------------------------------------------------------------------------------------------------------------------------------------------------------------------------------------------------------------------------------------------------------------------------------------------------------|---------|----------|--------------------------------------------------------|-------------|
| <input type="checkbox"/> | 1   | exp HIV Infections/ or HIV/ or exp HIV Long-Term Survivors/                                                                                                                                                                                                                                                                                                                                                                                                                                                                                                                                                                                                                                                                                                                                                                                                                                                                                                                                                                    | 277245  | Advanced | <a href="#">Display Results</a> <a href="#">More ▾</a> |             |
| <input type="checkbox"/> | 2   | (HIV or human immunodeficiency virus).mp. or HIV/aid* or HIV-infected.mp. or HIV-associated.mp. or HIV-positive.mp. or HIV positive.mp. or HIV+.mp. or people living with HIV.mp. or persons living with HIV.mp. or HIV patient*.mp. or HIV infection.mp. [mp=title, abstract, original title, name of substance word, subject heading word, floating sub-heading word, keyword heading word, organism supplementary concept word, protocol supplementary concept word, rare disease supplementary concept word, unique identifier, synonyms]                                                                                                                                                                                                                                                                                                                                                                                                                                                                                  | 351883  | Advanced | <a href="#">Display Results</a> <a href="#">More ▾</a> |             |
| <input type="checkbox"/> | 3   | exp health records, personal/ or exp patient generated health data/ or exp patient portals/                                                                                                                                                                                                                                                                                                                                                                                                                                                                                                                                                                                                                                                                                                                                                                                                                                                                                                                                    | 1636    | Advanced | <a href="#">Display Results</a> <a href="#">More ▾</a> |             |
| <input type="checkbox"/> | 4   | (Patient generated data or patient-generated data or patient generated health data or patient-generated health data or patient generated health information or patient-generated health information or personal health record* or patient portal* or personal data sharing or patient collected data or patient-collected data or personal health informat* or personal health data or electronic health record* or electronic personal health record* or electronic health data or self-recorded health data or self-recorded data or self-generated data or self-reported data or patient collated data or patient-collected data or patient-captured data or patient-controlled data or patient-reported data or electronic record).mp. [mp=title, abstract, original title, name of substance word, subject heading word, floating sub-heading word, keyword heading word, organism supplementary concept word, protocol supplementary concept word, rare disease supplementary concept word, unique identifier, synonyms] | 28979   | Advanced | <a href="#">Display Results</a> <a href="#">More ▾</a> |             |
| <input type="checkbox"/> | 5   | 1 or 2                                                                                                                                                                                                                                                                                                                                                                                                                                                                                                                                                                                                                                                                                                                                                                                                                                                                                                                                                                                                                         | 391186  | Advanced | <a href="#">Display Results</a> <a href="#">More ▾</a> |             |
| <input type="checkbox"/> | 6   | 3 or 4                                                                                                                                                                                                                                                                                                                                                                                                                                                                                                                                                                                                                                                                                                                                                                                                                                                                                                                                                                                                                         | 29523   | Advanced | <a href="#">Display Results</a> <a href="#">More ▾</a> |             |
| <input type="checkbox"/> | 7   | 5 and 6                                                                                                                                                                                                                                                                                                                                                                                                                                                                                                                                                                                                                                                                                                                                                                                                                                                                                                                                                                                                                        | 489     | Advanced | <a href="#">Display Results</a> <a href="#">More ▾</a> |             |
