# Supplementary material
Source: HighWire-hosted journal article supplement (https://bmjopen.bmj.com/content/11/5/e046393)
Supplement: inline-supplementary-material-4 [file inline-supplementary-material-4.pdf]

### Appendix D- Results from the Mixed Methods Appraisal Tool assessment

#### Bussone (2018)

| Study design                      | Methodological quality criteria                                                                    | Responses |    |            |
|-----------------------------------|----------------------------------------------------------------------------------------------------|-----------|----|------------|
|                                   |                                                                                                    | Yes       | No | Can't tell |
| Screening questions (all studies) | S1. Are there clear research questions?                                                            | X         |    |            |
|                                   | S2. Do the collected data allow to address the research questions?                                 | X         |    |            |
| Qualitative                       | 1.1. Is the qualitative approach appropriate to answer the research question?                      | X         |    |            |
|                                   | 1.2. Are the qualitative data collection methods adequate to address the research question?        | X         |    |            |
|                                   | 1.3. Are the findings adequately derived from the data?                                            | X         |    |            |
|                                   | 1.4. Is the interpretation of results sufficiently substantiated by data?                          | X         |    |            |
|                                   | 1.5. Is there coherence between qualitative data sources, collection, analysis and interpretation? | X         |    |            |

**DeSilva et al. (2013)**

| Study design                             | Methodological quality criteria                                                                    | Responses |    |            |
|------------------------------------------|----------------------------------------------------------------------------------------------------|-----------|----|------------|
|                                          |                                                                                                    | Yes       | No | Can't tell |
| <b>Screening questions (all studies)</b> | S1. Are there clear research questions?                                                            | X         |    |            |
|                                          | S2. Do the collected data allow to address the research questions?                                 | X         |    |            |
| <b>Qualitative</b>                       | 1.1. Is the qualitative approach appropriate to answer the research question?                      | X         |    |            |
|                                          | 1.2. Are the qualitative data collection methods adequate to address the research question?        | X         |    |            |
|                                          | 1.3. Are the findings adequately derived from the data?                                            |           |    | X          |
|                                          | 1.4. Is the interpretation of results sufficiently substantiated by data?                          |           |    | X          |
|                                          | 1.5. Is there coherence between qualitative data sources, collection, analysis and interpretation? |           |    | X          |

**Luque et al. (2013)**

| Study design                             | Methodological quality criteria                                               | Responses |    |            |
|------------------------------------------|-------------------------------------------------------------------------------|-----------|----|------------|
|                                          |                                                                               | Yes       | No | Can't tell |
| <b>Screening questions (all studies)</b> | S1. Are there clear research questions?                                       | X         |    |            |
|                                          | S2. Do the collected data allow to address the research questions?            | X         |    |            |
| <b>Quantitative descriptive</b>          | 4.1. Is the sampling strategy relevant to address the research question?      | X         |    |            |
|                                          | 4.2. Is the sample representative of the target population?                   |           | X  |            |
|                                          | 4.3. Are the measurements appropriate?                                        | X         |    |            |
|                                          | 4.4. Is the risk of nonresponse bias low?                                     | X         |    |            |
|                                          | 4.5. Is the statistical analysis appropriate to answer the research question? | X         |    |            |

**Marent, Henwood & Darking  
(2018)**

| Study design                      | Methodological quality criteria                                                                    | Responses |    |            |
|-----------------------------------|----------------------------------------------------------------------------------------------------|-----------|----|------------|
|                                   |                                                                                                    | Yes       | No | Can't tell |
| Screening questions (all studies) | S1. Are there clear research questions?                                                            | X         |    |            |
|                                   | S2. Do the collected data allow to address the research questions?                                 | X         |    |            |
| Qualitative                       | 1.1. Is the qualitative approach appropriate to answer the research question?                      | X         |    |            |
|                                   | 1.2. Are the qualitative data collection methods adequate to address the research question?        | X         |    |            |
|                                   | 1.3. Are the findings adequately derived from the data?                                            | X         |    |            |
|                                   | 1.4. Is the interpretation of results sufficiently substantiated by data?                          | X         |    |            |
|                                   | 1.5. Is there coherence between qualitative data sources, collection, analysis and interpretation? | X         |    |            |

**Nokes et al. (2013)**

| Study design                             | Methodological quality criteria                                               | Responses |    |            |
|------------------------------------------|-------------------------------------------------------------------------------|-----------|----|------------|
|                                          |                                                                               | Yes       | No | Can't tell |
| <b>Screening questions (all studies)</b> | S1. Are there clear research questions?                                       | X         |    |            |
|                                          | S2. Do the collected data allow to address the research questions?            | X         |    |            |
| <b>Quantitative descriptive</b>          | 4.1. Is the sampling strategy relevant to address the research question?      | X         |    |            |
|                                          | 4.2. Is the sample representative of the target population?                   | X         |    |            |
|                                          | 4.3. Are the measurements appropriate?                                        | X         |    |            |
|                                          | 4.4. Is the risk of nonresponse bias low?                                     | X         |    |            |
|                                          | 4.5. Is the statistical analysis appropriate to answer the research question? | X         |    |            |

**Odlum et al. (2014)**

| Study design                             | Methodological quality criteria                                                                    | Responses |    |            |
|------------------------------------------|----------------------------------------------------------------------------------------------------|-----------|----|------------|
|                                          |                                                                                                    | Yes       | No | Can't tell |
| <b>Screening questions (all studies)</b> | S1. Are there clear research questions?                                                            | X         |    |            |
|                                          | S2. Do the collected data allow to address the research questions?                                 | X         |    |            |
| <b>Qualitative</b>                       | 1.1. Is the qualitative approach appropriate to answer the research question?                      | X         |    |            |
|                                          | 1.2. Are the qualitative data collection methods adequate to address the research question?        | X         |    |            |
|                                          | 1.3. Are the findings adequately derived from the data?                                            | X         |    |            |
|                                          | 1.4. Is the interpretation of results sufficiently substantiated by data?                          | X         |    |            |
|                                          | 1.5. Is there coherence between qualitative data sources, collection, analysis and interpretation? | X         |    |            |
| <b>Quantitative descriptive</b>          | 4.1. Is the sampling strategy relevant to address the research question?                           |           |    | X          |

|                      |                                                                                                                         |  |   |   |
|----------------------|-------------------------------------------------------------------------------------------------------------------------|--|---|---|
|                      | 4.2. Is the sample representative of the target population?                                                             |  | X |   |
|                      | 4.3. Are the measurements appropriate?                                                                                  |  |   | X |
|                      | 4.4. Is the risk of nonresponse bias low?                                                                               |  |   | X |
|                      | 4.5. Is the statistical analysis appropriate to answer the research question?                                           |  |   | X |
| <b>Mixed methods</b> | 5.1. Is there an adequate rationale for using a mixed methods design to address the research question?                  |  | X |   |
|                      | 5.2. Are the different components of the study effectively integrated to answer the research question?                  |  | X |   |
|                      | 5.3. Are the outputs of the integration of qualitative and quantitative components adequately interpreted?              |  | X |   |
|                      | 5.4. Are divergences and inconsistencies between quantitative and qualitative results adequately addressed?             |  | X |   |
|                      | 5.5. Do the different components of the study adhere to the quality criteria of each tradition of the methods involved? |  |   | X |

**Ramanathan et al. (2013)**

| Study design                             | Methodological quality criteria                                                                    | Responses |    |            |
|------------------------------------------|----------------------------------------------------------------------------------------------------|-----------|----|------------|
|                                          |                                                                                                    | Yes       | No | Can't tell |
| <b>Screening questions (all studies)</b> | S1. Are there clear research questions?                                                            | X         |    |            |
|                                          | S2. Do the collected data allow to address the research questions?                                 | X         |    |            |
| <b>Qualitative</b>                       | 1.1. Is the qualitative approach appropriate to answer the research question?                      | X         |    |            |
|                                          | 1.2. Are the qualitative data collection methods adequate to address the research question?        | X         |    |            |
|                                          | 1.3. Are the findings adequately derived from the data?                                            | X         |    |            |
|                                          | 1.4. Is the interpretation of results sufficiently substantiated by data?                          | X         |    |            |
|                                          | 1.5. Is there coherence between qualitative data sources, collection, analysis and interpretation? | X         |    |            |



**Swendeman et al. (2016)**

| Study design                             | Methodological quality criteria                                                                    | Responses |    |            |
|------------------------------------------|----------------------------------------------------------------------------------------------------|-----------|----|------------|
|                                          |                                                                                                    | Yes       | No | Can't tell |
| <b>Screening questions (all studies)</b> | S1. Are there clear research questions?                                                            | X         |    |            |
|                                          | S2. Do the collected data allow to address the research questions?                                 | X         |    |            |
| <b>Qualitative</b>                       | 1.1. Is the qualitative approach appropriate to answer the research question?                      | X         |    |            |
|                                          | 1.2. Are the qualitative data collection methods adequate to address the research question?        | X         |    |            |
|                                          | 1.3. Are the findings adequately derived from the data?                                            | X         |    |            |
|                                          | 1.4. Is the interpretation of results sufficiently substantiated by data?                          | X         |    |            |
|                                          | 1.5. Is there coherence between qualitative data sources, collection, analysis and interpretation? | X         |    |            |

**Schnall et al. (2011)**

| Study design                             | Methodological quality criteria                                                                    | Responses |    |            |
|------------------------------------------|----------------------------------------------------------------------------------------------------|-----------|----|------------|
|                                          |                                                                                                    | Yes       | No | Can't tell |
| <b>Screening questions (all studies)</b> | S1. Are there clear research questions?                                                            | X         |    |            |
|                                          | S2. Do the collected data allow to address the research questions?                                 | X         |    |            |
| <b>Qualitative</b>                       | 1.1. Is the qualitative approach appropriate to answer the research question?                      | X         |    |            |
|                                          | 1.2. Are the qualitative data collection methods adequate to address the research question?        | X         |    |            |
|                                          | 1.3. Are the findings adequately derived from the data?                                            | X         |    |            |
|                                          | 1.4. Is the interpretation of results sufficiently substantiated by data?                          | X         |    |            |
|                                          | 1.5. Is there coherence between qualitative data sources, collection, analysis and interpretation? | X         |    |            |

**Schnall et al. (2016)**

| Study design                             | Methodological quality criteria                                                                    | Responses |    |            |
|------------------------------------------|----------------------------------------------------------------------------------------------------|-----------|----|------------|
|                                          |                                                                                                    | Yes       | No | Can't tell |
| <b>Screening questions (all studies)</b> | S1. Are there clear research questions?                                                            | X         |    |            |
|                                          | S2. Do the collected data allow to address the research questions?                                 |           | X  |            |
| <b>Qualitative</b>                       | 1.1. Is the qualitative approach appropriate to answer the research question?                      |           |    | X          |
|                                          | 1.2. Are the qualitative data collection methods adequate to address the research question?        |           |    | X          |
|                                          | 1.3. Are the findings adequately derived from the data?                                            |           |    | X          |
|                                          | 1.4. Is the interpretation of results sufficiently substantiated by data?                          |           |    | X          |
|                                          | 1.5. Is there coherence between qualitative data sources, collection, analysis and interpretation? |           |    | X          |
| <b>Quantitative descriptive</b>          | 4.1. Is the sampling strategy relevant to address the research question?                           |           | X  |            |

|                      |                                                                                                                         |  |   |     |
|----------------------|-------------------------------------------------------------------------------------------------------------------------|--|---|-----|
|                      | 4.2. Is the sample representative of the target population?                                                             |  | X |     |
|                      | 4.3. Are the measurements appropriate?                                                                                  |  |   | X   |
|                      | 4.4. Is the risk of nonresponse bias low?                                                                               |  |   | X   |
|                      | 4.5. Is the statistical analysis appropriate to answer the research question?                                           |  |   | N/A |
| <b>Mixed methods</b> | 5.1. Is there an adequate rationale for using a mixed methods design to address the research question?                  |  | X |     |
|                      | 5.2. Are the different components of the study effectively integrated to answer the research question?                  |  | X |     |
|                      | 5.3. Are the outputs of the integration of qualitative and quantitative components adequately interpreted?              |  | X |     |
|                      | 5.4. Are divergences and inconsistencies between quantitative and qualitative results adequately addressed?             |  | X |     |
|                      | 5.5. Do the different components of the study adhere to the quality criteria of each tradition of the methods involved? |  | X |     |

**Stonbraker et al. (2018)**

| Study design                             | Methodological quality criteria                                                                    | Responses |    |            |
|------------------------------------------|----------------------------------------------------------------------------------------------------|-----------|----|------------|
|                                          |                                                                                                    | Yes       | No | Can't tell |
| <b>Screening questions (all studies)</b> | S1. Are there clear research questions?                                                            | X         |    |            |
|                                          | S2. Do the collected data allow to address the research questions?                                 | X         |    |            |
| <b>Qualitative</b>                       | 1.1. Is the qualitative approach appropriate to answer the research question?                      |           |    | X          |
|                                          | 1.2. Are the qualitative data collection methods adequate to address the research question?        |           |    | X          |
|                                          | 1.3. Are the findings adequately derived from the data?                                            | X         |    |            |
|                                          | 1.4. Is the interpretation of results sufficiently substantiated by data?                          | X         |    |            |
|                                          | 1.5. Is there coherence between qualitative data sources, collection, analysis and interpretation? | X         |    |            |
| <b>Quantitative descriptive</b>          | 4.1. Is the sampling strategy relevant to address the research question?                           |           |    | X          |

|                      |                                                                                                                         |  |   |   |
|----------------------|-------------------------------------------------------------------------------------------------------------------------|--|---|---|
|                      | 4.2. Is the sample representative of the target population?                                                             |  | X |   |
|                      | 4.3. Are the measurements appropriate?                                                                                  |  |   | X |
|                      | 4.4. Is the risk of nonresponse bias low?                                                                               |  |   | X |
|                      | 4.5. Is the statistical analysis appropriate to answer the research question?                                           |  |   | X |
| <b>Mixed methods</b> | 5.1. Is there an adequate rationale for using a mixed methods design to address the research question?                  |  | X |   |
|                      | 5.2. Are the different components of the study effectively integrated to answer the research question?                  |  | X |   |
|                      | 5.3. Are the outputs of the integration of qualitative and quantitative components adequately interpreted?              |  | X |   |
|                      | 5.4. Are divergences and inconsistencies between quantitative and qualitative results adequately addressed?             |  | X |   |
|                      | 5.5. Do the different components of the study adhere to the quality criteria of each tradition of the methods involved? |  | X |   |
